# Supplementary material for: Are Lumen-Apposing Metal Stents More Effective Than Plastic Stents for the Management of Pancreatic Fluid Collections: An Updated Systematic Review and Meta-analysis
Source: Hindawi journal article supplement (doi:10.1155/2020/4952721), 2020-04-20
Supplement: f1 [file 4952721.f1.pdf]

Table S1 Search strategy

|        |                                                                                                                                                                                                                                                                                                                                                                                                                                                                                                                                                                                                                                                                                      |
|--------|--------------------------------------------------------------------------------------------------------------------------------------------------------------------------------------------------------------------------------------------------------------------------------------------------------------------------------------------------------------------------------------------------------------------------------------------------------------------------------------------------------------------------------------------------------------------------------------------------------------------------------------------------------------------------------------|
| Pubmed | <p>pancreatic fluid collection OR peripancreatic-fluid-collection OR PFC OR Pancreatic-fluid-collection* OR peripancreatic-fluid-collection*</p> <p>OR</p> <p>walled-off-pancreatic-necros* OR WOPN OR walled-off-necros* OR WON OR necrotic-collection* OR cystic-collection*</p> <p>OR</p> <p>pancreatic pseudocyst [Mesh] OR Pancreatic Pseudocysts OR Pseudocyst, Pancreatic OR Pseudocysts, Pancreatic</p> <p>AND</p> <p>Lumen-apposing-metal-stent* OR lumen-apposing metallic-stent* OR lumen-apposing-stent* OR LAMS OR lumen-apposing-self-expandable-metallic-stent* OR lumen-apposing-self-expandable-metal-stent* OR AXIOS OR metal stent* OR Stents [Mesh] OR Stent</p> |
| Embase | <p>'pancreas pseudocyst'/exp OR 'pancreas abscess'/exp OR Pancreatic-fluid-collection* OR walled-of-pancreatic-necros* OR WOPN OR pancreatic-abscess* OR peripancreatic-fluid-collection*</p> <p>OR</p> <p>((Pancreas OR pancreatic OR intrapancreatic OR peripancreatic) AND (pseudocyst* OR walled-of-necros* OR WON OR necrotic-collection* OR cystic-collection*))</p>                                                                                                                                                                                                                                                                                                           |

---

AND

Lumen-apposing-metal-stent\* OR lumen-apposing metallic-stent\* OR lumen-apposing-stent\* OR LAMS OR lumen-apposing-self-expandable-metallic-stent\* OR lumen-apposing-self-expandable-metal-stent\* OR LASEMS OR self-expandable-metal-stent\* OR self-expandable-metallic-stent\* OR self-expanding-metal stent\* OR self-expanding-metallic-stent\* OR AXIOS

---

Medline

Lumen-apposing-metal-stent\* [tiab] OR lumen-apposing metallic-stent\* [tiab] OR metal stent\* [tiab] OR stent\* [tiab] OR LAMS [tiab] OR AXIOS [tiab]

AND

pancreatic fluid collection [tiab] OR peripancreatic-fluid-collection [tiab] OR PFC OR Pancreatic-fluid-collection\* [tiab] OR peripancreatic-fluid-collection\* [tiab]

---

Cochrane

pancreatic fluid collection OR peripancreatic-fluid-collection OR PFC OR Pancreatic-fluid-collection\* OR peripancreatic-fluid-collection\*

OR

walled-off-pancreatic-necros\* OR WOPN OR walled-off-necros\* OR WON OR necrotic-collection\* OR cystic-collection\*

OR

pancreatic pseudocyst [Mesh] OR Pancreatic Pseudocysts OR Pseudocyst, Pancreatic OR Pseudocysts, Pancreatic

---

---

AND

Lumen-apposing-metal-stent OR lumen-apposing metallic-stent OR LAMS OR AXIOS

---

Table S2 Adverse events rate of Lumen-Apposing Metal Stents (LAMS)

| Complications                                | N (%)      |
|----------------------------------------------|------------|
| Infection/Occlusion                          | 66 (7.2%)  |
| Bleeding                                     | 47 (5.1%)  |
| Migration                                    | 23 (2.5%)  |
| Perforation                                  | 10 (1.1%)  |
| Stent dislodgement/displacement/misplacement | 10 (1.1%)  |
| Abdominal pain                               | 5 (0.5%)   |
| Unplanned endoscopy                          | 5 (0.5%)   |
| Additional percutaneous drain                | 4 (0.4%)   |
| Stricture                                    | 3 (0.3%)   |
| Buried stent                                 | 2 (0.2%)   |
| Partially embedded stent                     | 2 (0.2%)   |
| Pneumoperitoneum                             | 2 (0.2%)   |
| Others                                       | 6 (0.7%)   |
| Total                                        | 185(20.0%) |

Table S3 Major adverse events of the meta-analysis

| Author, year, country                           | Bleeding |               | Infection/Occlusion |               | Migration |               |
|-------------------------------------------------|----------|---------------|---------------------|---------------|-----------|---------------|
|                                                 | LAMS     | Plastic stent | LAMS                | Plastic stent | LAMS      | Plastic stent |
| Lang GD et al. <sup>14</sup> ,<br>2017, USA     | 4/19     | 1/84          | -                   | -             | -         | -             |
| Siddiqui AA et al. <sup>10</sup> ,<br>2016, USA | 6/86     | 2/106         | 4/86                | 28/106        | 0/86      | 3/106         |
| Brimhall B et al. <sup>13</sup> ,<br>2018, USA  | 15/97    | 5/152         | 2/97                | 6/152         | -         | -             |
| Bang JY et al. <sup>26</sup> ,<br>2016, USA     | -        | -             | 2/20                | 5/40          | 2/20      | 1/40          |
| Bang JY et al. <sup>12</sup> ,<br>2018, USA     | 4/31     | 0/29          | -                   | -             | 1/31      | 2/29          |
| Total                                           | 29/233   | 8/371         | 8/203               | 39/298        | 3/137     | 6/175         |

LAMS, Lumen-Apposing Metal Stents
